# Supplementary material
Source: publisher figshare collection journal article supplement (https://asha.figshare.com/ndownloader/files/37419364)
Supplement: Supplementary file 1 [file 37419364]

## Supplemental Material S1

### Mentor Interview Guides

#### *Past Experiences as a college student with concussion*

1. **Tell us about you as a student.**
2. **Before you had one, what did you know about concussion?**
  - Did your experience match what you knew?
3. **Did your concussion affect your academics?** (*may not yet be known for Mentees*)
  - Changes to school (course load, classes, major, etc.)
  - Did some subjects seem more difficult than others? If so, which ones?
  - Was there any change to your grades?
4. **Did you/Do you receive support services from your school?**
  - Accommodations?
  - Did you talk with your professors?
  - Were your/are your needs met by your school?
  - Which offices were helpful?
5. **Are you currently receiving the academic supports you need?**
  - Not needed, Yes, No (if no, please elaborate)

#### *Current experiences as a college student*

6. **How is school going for you now?**
  - How many credit hours, grades, attendance, on track to graduate, etc.
  - Any changes to course load?

#### *Other Life Changes and Experiences*

7. **Did you experience/are you experiencing other life changes, such as changes to work, living situation, social life, etc?**
  - Socially? Work? Roommates? Sports?
8. **What was most helpful/harmful for you during recovery?**
  - (probe for both positive and negative)
9. **How did you know that you had recovered?**
10. **What do you feel like you may have gained or lost because of your concussion?**
  - (probe for both positive and negative)
11. **Did you learn anything from your concussion, or about yourself going through that experience?**

#### *Peer Mentoring*

12. **What interests you about being a peer mentor?**
13. **What do you feel like you have to offer as a peer mentor?**
14. **What do you hope to gain from this experience?**
